# Supplementary material for: ORGANIZATIONAL DECISION CHEMISTRY ON A LATTICE
Source: Frontiers journal article supplement (doi:10.3389/fnut.2024.1364033), 2003-01-01
Supplement: Table_1.pdf [file Table_1.pdf]

Supplementary Material

**Zinc contents of foods and estimates of dietary intakes in Guangzhou,  
Guangdong Province, China**

Wenqiang Mai<sup>1,2</sup>, Fan Wang<sup>1</sup>, Shuyou He<sup>3,4</sup>, Yanmao Wen<sup>4</sup>, Guanghui Yu<sup>5</sup>, Lei  
Zhang<sup>6</sup>, Hanying Dong<sup>1\*</sup>

<sup>1</sup>School of Atmospheric Sciences, Sun Yat-sen University, Zhuhai 519082, China

<sup>2</sup>Foshan Meteorological Service, Foshan 528010, China

<sup>3</sup>Guangxi Green Hope Investment Co. Ltd, Nanning 530028, China

<sup>4</sup>School of Environmental Science and Engineering, Sun Yat-sen University, Guangzhou  
510006, China

<sup>5</sup>School of Resource & Environment and Safety Engineering, Hunan University of Science  
and Technology, Xiangtan 411201, China

<sup>6</sup>Zhongkai University of Agriculture and Engineering, Guangzhou 510225, China

Corresponding author: eesdhy@mail.sysu.edu.cn

**Table S1 Daily intake food weight for a normal person or per individual in households of low, middle, or high-income levels**

| <b>Food type</b>    | <b>Normal person</b> | <b>Low-income household</b> | <b>Middle-income household</b> | <b>High-income household</b> |
|---------------------|----------------------|-----------------------------|--------------------------------|------------------------------|
| Rice                | 290.7                | 380.3                       | 331.8                          | 276.7                        |
| Flour               | 48                   | 12.1                        | 31.6                           | 51.1                         |
| Other grains        | 9.1                  | 2.2                         | 4.7                            | 9.6                          |
| Potato-like food    | 10.2                 | 24.2                        | 20.6                           | 9.5                          |
| Pulse food          | 3.3                  | 7.9                         | 4.1                            | 4.2                          |
| Bean products       | 29.1                 | 25.7                        | 32.5                           | 30.7                         |
| Vegetables          | 313.8                | 270.3                       | 294                            | 322.5                        |
| Fruits              | 70.1                 | 37.4                        | 60.3                           | 81.6                         |
| Nuts                | 4.8                  | 3.7                         | 4.1                            | 5.4                          |
| Pork                | 122.5                | 71.4                        | 108.8                          | 122.1                        |
| Beef and mutton     | 16.8                 | 2.7                         | 11.7                           | 17.7                         |
| Viscera             | 10.9                 | 6.8                         | 10.4                           | 13.2                         |
| Poultry             | 57.4                 | 21.1                        | 41                             | 62.7                         |
| Dairy food          | 38.8                 | 2.8                         | 14.9                           | 49.1                         |
| Eggs                | 27.6                 | 13.6                        | 19.7                           | 30                           |
| Aquatic food        | 70.8                 | 41.6                        | 50.9                           | 74.4                         |
| Vegetable oil       | 37.5                 | 16.5                        | 33.5                           | 41.8                         |
| Animal fat          | 0.1                  | 15.3                        | 5.3                            | 0.3                          |
| Pastries and snacks | 25.2                 | 4.5                         | 12.5                           | 28                           |
| Sugar and starch    | 7.4                  | 3.4                         | 7.1                            | 7.2                          |
| Salt                | 8.7                  | 10.6                        | 10.3                           | 9.1                          |
| Sauce               | 14.4                 | 9.7                         | 11.9                           | 15.5                         |
| Alcohol             | 5.5                  | 4.3                         | 4.3                            | 8.7                          |

**Table S2 Daily intake food weight of different foods for various demographic groups in Guangzhou city**

| <b>Food type</b>    | <b>Elderly<br/>resident</b> | <b>College<br/>student</b> | <b>Factory<br/>worker</b> | <b>Kindergarten<br/>child</b> |
|---------------------|-----------------------------|----------------------------|---------------------------|-------------------------------|
| Rice                | 219.8                       | 365.3                      | 389.5                     | 181.6                         |
| Flour               | 49.3                        | 45.2                       | 13.2                      | 23.5                          |
| Other grains        | 10.2                        | 6.5                        | 2.3                       | 12.3                          |
| Potato food         | 10.4                        | 6.5                        | 18.9                      | 2.6                           |
| Pulse food          | 2.3                         | 2.1                        | 7.8                       | 0.3                           |
| Bean products       | 34.2                        | 24.3                       | 21.9                      | 24.5                          |
| Vegetables          | 274.1                       | 274.9                      | 259                       | 210.2                         |
| Fruits              | 50.3                        | 50.3                       | 27.9                      | 46.3                          |
| Nuts                | 1.3                         | 3.5                        | 2.2                       | 0.9                           |
| Pork                | 87.9                        | 107.6                      | 79.6                      | 85.8                          |
| Beef and mutton     | 10.6                        | 12.3                       | 2.5                       | 8.6                           |
| Viscera             | 8.6                         | 9.8                        | 5.7                       | 8.7                           |
| Poultry             | 40.3                        | 42.3                       | 31.2                      | 23.4                          |
| Dairy food          | 15.6                        | 18.5                       | 3                         | 25.4                          |
| Eggs                | 25.6                        | 17.5                       | 14                        | 22.3                          |
| Aquatic food        | 64.2                        | 56.4                       | 43.2                      | 55.6                          |
| Vegetable oil       | 21.1                        | 20.6                       | 14.6                      | 16.8                          |
| Animal fat          | 1.1                         | 12.7                       | 18.2                      | 0.1                           |
| Pastries and snacks | 14.2                        | 19.6                       | 4.1                       | 9.8                           |
| Sugar and starch    | 5.6                         | 7.2                        | 2.8                       | 5.3                           |
| Salt                | 8.6                         | 10.3                       | 10.4                      | 5.3                           |
| Sauce               | 10.3                        | 11.3                       | 10.2                      | 5.8                           |
| Alcohol             | 2.3                         | 1.3                        | 4.5                       | 0                             |

Table S3 Daily sales proportions of various foods in the Guangzhou market

| Aquatic food    |            | Vegetables             |            | Eggs          |            | Fruits                                                                                   |            | Poultry |            | Red meat |            |
|-----------------|------------|------------------------|------------|---------------|------------|------------------------------------------------------------------------------------------|------------|---------|------------|----------|------------|
| Type            | Proportion | Type                   | Proportion | Type          | Proportion | Type                                                                                     | Proportion | Type    | Proportion | Type     | Proportion |
| Freshwater fish | 60%        | Leaf vegetables        | 53%        | Chicken egg   | 80%        | Common fruits (apple, banana, pear, orange, pomelo, tangerine, water melon, honey melon) | 70%        | Goose   | 42%        | Beef     | 85%        |
| Marine fish     | 20%        | Root/stem vegetables   | 11%        | Preserved egg | 10%        |                                                                                          | 30%        | Chicken | 39%        | Mutton   | 15%        |
| Mollusks        | 8%         | Gourd vegetables       | 15%        | Salted egg    | 10%        |                                                                                          |            | Duck    | 18%        |          |            |
| Crustaceans     | 12%        | Solanaceous vegetables | 12%        |               |            |                                                                                          |            | Quail   | 1%         |          |            |
|                 |            | Legume vegetables      | 6%         |               |            |                                                                                          |            |         |            |          |            |
|                 |            | Bulb vegetables        | 2%         |               |            |                                                                                          |            |         |            |          |            |
|                 |            | Edible fungi           | 1%         |               |            |                                                                                          |            |         |            |          |            |
